# Supplementary material for: Corpus Iuris, Ministerio Fiscal Europeo y juicios nacionales para eurocrímenes: ¿es necesaria una Sala de Justicia Europea para la fase previa?
Source: MDPI journal article supplement (doi:10.3390/foods11030429), 1999-01-01
Supplement: s1 [file s1]

# Supplementary Information

## Optimization of the Recovery of Secondary Metabolites from defatted *Brassica carinata* meal and Its Effects on the Extractability and Functional Properties of Proteins

V. P. Thinh NGUYEN,<sup>†‡</sup> Jon D. STEWART,<sup>‡</sup> Florent ALLAIS<sup>\*,†,‡</sup> and Irina IOANNOU<sup>\*,†</sup>

<sup>†</sup>URD ABI, CEBB, AgroParisTech, 51110 Pomacle, France

<sup>‡</sup>Department of Chemistry, University of Florida, 32611 Gainesville, Florida, USA

Experimental data obtained for the D-optimal design are presented in **Table S1** for  $Y_1$  (Phenolic compound content) and in **Table S2** for  $Y_2$  (Glucosinolate content).

**Table S1.** Phenolic compound content of AE and alkaline extracts.

| Entries | %EtOH | $T_e$ (°C) | Phenolic compound content of AE extracts (mg/g <sub>DM</sub> ) | Phenolic compound content of alkaline extracts (mg/g <sub>DM</sub> ) |
|---------|-------|------------|----------------------------------------------------------------|----------------------------------------------------------------------|
| 0       | 0     | 25         | -                                                              | 6.6723                                                               |
| 1       | 70    | 50         | 10.3764                                                        | 1.4336                                                               |
| 2       | 20    | 25         | 8.0726                                                         | 1.4033                                                               |
| 3       | 70    | 50         | 9.8962                                                         | 1.2599                                                               |
| 4       | 20    | 50         | 8.6998                                                         | 1.2901                                                               |
| 5       | 45    | 50         | 11.3354                                                        | 1.1287                                                               |
| 6       | 20    | 75         | 10.0643                                                        | 1.2110                                                               |
| 7       | 70    | 25         | 10.4755                                                        | 1.6094                                                               |
| 8       | 70    | 50         | 10.3432                                                        | 1.4518                                                               |
| 9       | 90    | 25         | 8.6687                                                         | 1.9641                                                               |
| 10      | 20    | 25         | 7.2657                                                         | 1.6398                                                               |
| 11      | 90    | 50         | 9.4402                                                         | 1.8860                                                               |
| 12      | 45    | 75         | 10.2762                                                        | 1.3258                                                               |
| 13      | 70    | 75         | 9.7151                                                         | 1.4688                                                               |

The model predicting the phenolic compound content with unscaled coefficients is shown in **Equation S1**:

$$\begin{aligned} \text{Log}(Y_1) = & 0.6028 + 0.0090\% \text{EtOH} + 0.0069 T_e - (6.3289 \times 10^{-5})\% \text{EtOH}^2 \\ & -(4.0226 \times 10^{-5})T_e^2 - (4.3260 \times 10^{-5})\% \text{EtOH}T_e, \end{aligned} \quad (\text{S1})$$

**Table S2.** Glucosinolate content of AE and alkaline extracts.

| Entries | %EtOH | $T_e$ (°C) | Glucosinolate content of AE extracts (μmol/g <sub>DM</sub> ) | Glucosinolate content of alkaline extracts (μmol/g <sub>DM</sub> ) |
|---------|-------|------------|--------------------------------------------------------------|--------------------------------------------------------------------|
| 0       | 0     | 25         | -                                                            | 70.7482                                                            |
| 1       | 70    | 50         | 72.0563                                                      | 13.3285                                                            |
| 2       | 20    | 25         | 88.1575                                                      | 7.6720                                                             |
| 3       | 70    | 50         | 87.7529                                                      | 12.3955                                                            |
| 4       | 20    | 50         | 92.3045                                                      | 12.6897                                                            |
| 5       | 45    | 50         | 93.6177                                                      | 2.0007                                                             |
| 6       | 20    | 75         | 94.0140                                                      | -0.0395                                                            |
| 7       | 70    | 25         | 74.3477                                                      | 25.5384                                                            |
| 8       | 70    | 50         | 32.5855                                                      | 14.9310                                                            |
| 9       | 90    | 25         | 42.5303                                                      | 42.7234                                                            |
| 10      | 20    | 25         | 79.1531                                                      | 14.9071                                                            |

|    |    |    |         |         |
|----|----|----|---------|---------|
| 11 | 90 | 50 | 47.6201 | 41.1014 |
| 12 | 45 | 75 | 91.6635 | 5.0773  |
| 13 | 70 | 75 | 83.1287 | 6.3332  |

The model predicting the glucosinolate content with unscaled coefficients is shown in **Equation S2**:

$$\begin{aligned} \text{Log}(Y_2) = & 1.7708 + 0.0073\% \text{ EtOH} + 0.0028 T_e - (1.1128 \times 10^{-4})\% \text{ EtOH}^2 \\ & -(3.2136 \times 10^{-5})T_e^2 - (2.60154 \times 10^{-5})\% \text{ EtOH}T_e, \end{aligned} \quad (\text{S2})$$

An extern validation of the models generated by the D-optimal design was carried out for the two optimal operating conditions found in the study. Results are presented **Table S3**.

**Table S3.** Extern validation of prediction models.

|                  | $Y_1$ (mg/g)                                                      | $Y_2$ (mg/g)     | $Y_3$ (%)                                        |
|------------------|-------------------------------------------------------------------|------------------|--------------------------------------------------|
|                  | Conditions optimizing $Y_1$ and $Y_2$ (47% ethanol, 62 °C)        |                  | Conditions optimizing $Y_3$ (90% ethanol, 25 °C) |
| Predicted values | $10.87 \pm 0.54$                                                  | $98.96 \pm 4.9$  | $76 \pm 3.8$                                     |
| Observed values  | $11.74 \pm 1.26$                                                  | $103.6 \pm 16.2$ | $78.8 \pm 0.7$                                   |
| p-value          | 0.132                                                             | 0.722            | 0.544                                            |
| (Student test)   |                                                                   |                  |                                                  |
|                  | Condition optimizing $Y_1$ , $Y_2$ and $Y_3$ (22% ethanol, 50 °C) |                  |                                                  |
| Predicted values | $9.15 \pm 0.09$                                                   | $91.02 \pm 0.93$ | $61.12 \pm 0.61$                                 |
| Observed values  | $9.12 \pm 0.05$                                                   | $86.54 \pm 3.18$ | $59.8 \pm 2.1$                                   |
| p-value          | 0.64                                                              | 0.08             | 0.35                                             |
| (Student test)   |                                                                   |                  |                                                  |

Experimental data obtained for the D-optimal design are presented in **Table S4** for  $Y_3$  (extractability index of proteins)

**Table S4.** Extractability index (EI) of proteins of AE and alkaline extracts.

| Entries | %EtOH | $T_e$ (°C) | Protein EI of AE<br>extracts (%) | Protein EI of alkaline<br>extracts (%) |
|---------|-------|------------|----------------------------------|----------------------------------------|
| 0       | 0     | 25         | -                                | 59.22                                  |
| 1       | 70    | 50         | 41.3                             | 64.26                                  |
| 2       | 20    | 25         | 48.5                             | 65.75                                  |
| 3       | 70    | 50         | 42.5                             | 64.9                                   |
| 4       | 20    | 50         | 46.5                             | 67.3                                   |
| 5       | 45    | 50         | 48.7                             | 63.8                                   |
| 6       | 20    | 75         | 47.2                             | 58.7                                   |
| 7       | 70    | 25         | 42.3                             | 67.2                                   |
| 8       | 70    | 50         | 46.9                             | 62.7                                   |
| 9       | 90    | 25         | 44.4                             | 63.6                                   |
| 10      | 20    | 25         | 48.3                             | 67.3                                   |
| 11      | 90    | 50         | 44.5                             | 63.8                                   |
| 12      | 45    | 75         | 54.5                             | 58.1                                   |
| 13      | 70    | 75         | 51.3                             | 55.7                                   |

The model predicting the extractability index with unscaled coefficients is shown in **Equation S3**:

$$-\text{Log}(100-Y_3) = -1.5924 - 0.0053\% \text{ EtOH} + 0.0042 T_e - (1.0742 \times 10^{-4})\% \text{ EtOH}^2 - (1.3123 \times 10^{-4})\% \text{ EtOH} T_e, \quad (\text{S3})$$

The analysis by HPLC of Carinata meal's aqueous ethanol extraction was conducted and shown in **Figure S1**. The variation of extractions conditions resulted in different sinapine concentrations extracted sinapine concentrations.

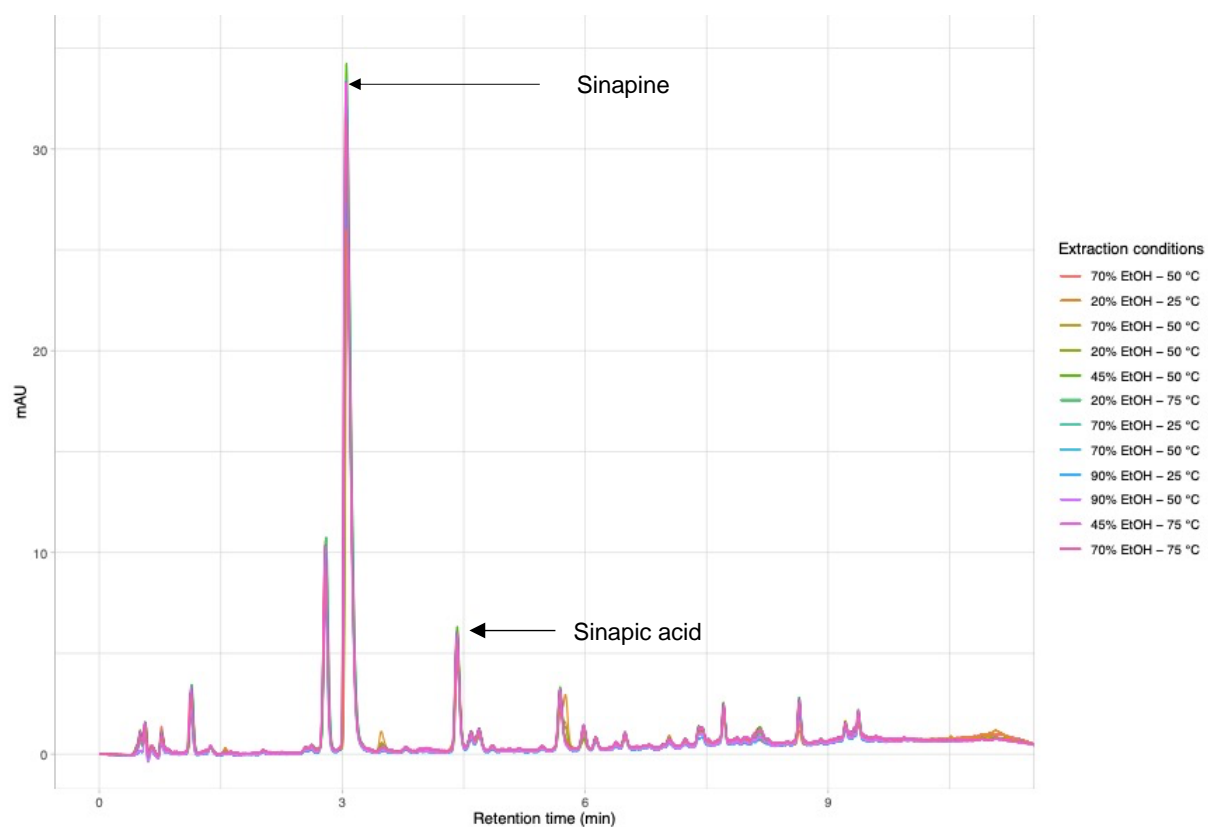

**Figure S1.** Phenolic compounds analysis by HPLC of aqueous ethanol extracts under different extraction conditions. Samples were prepared and analyzed by HPLC as described in our previous study [22]. Chromatograms were recorded at 320 nm.

The analysis of aqueous ethanol extraction effect on Carinata meal's glucosinolates was conducted and shown in **Figure S2**. The variation of extractions conditions resulted in different extracted desulfated sinigrin concentrations.

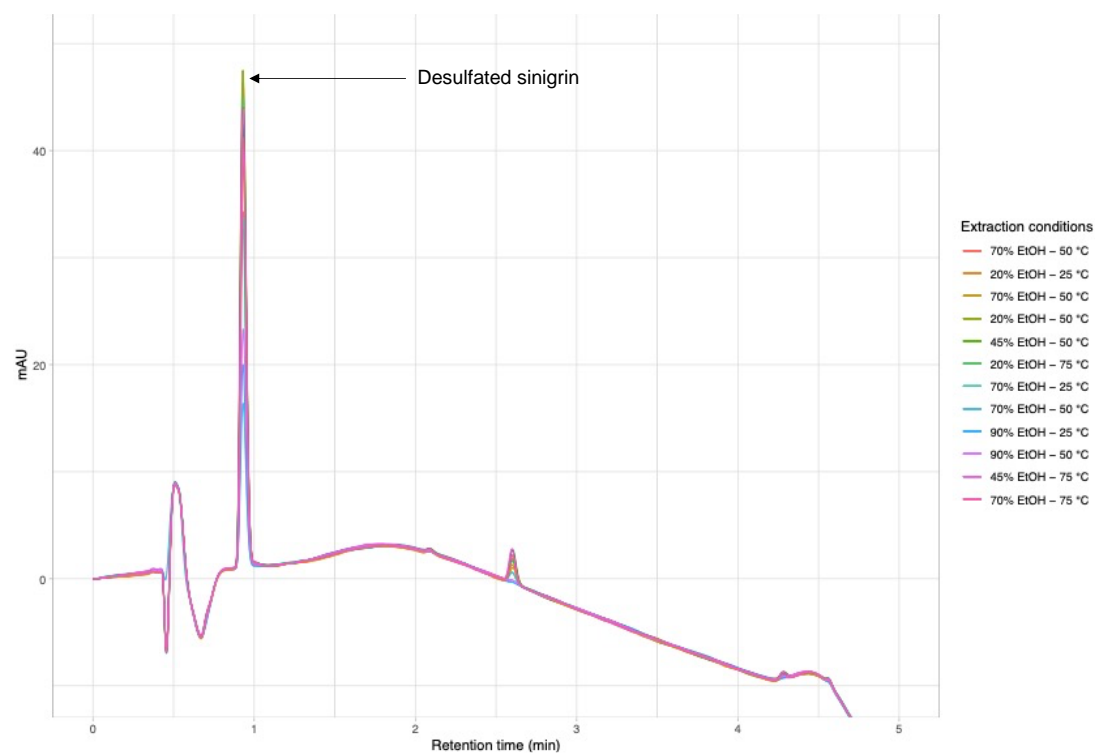

**Figure S2.** Glucosinolates analysis of aqueous ethanol extract at different extraction conditions. Samples were prepared and analyzed by HPLC as described by Grosser and van Dam [32]. Chromatograms were recorded at 229 nm.

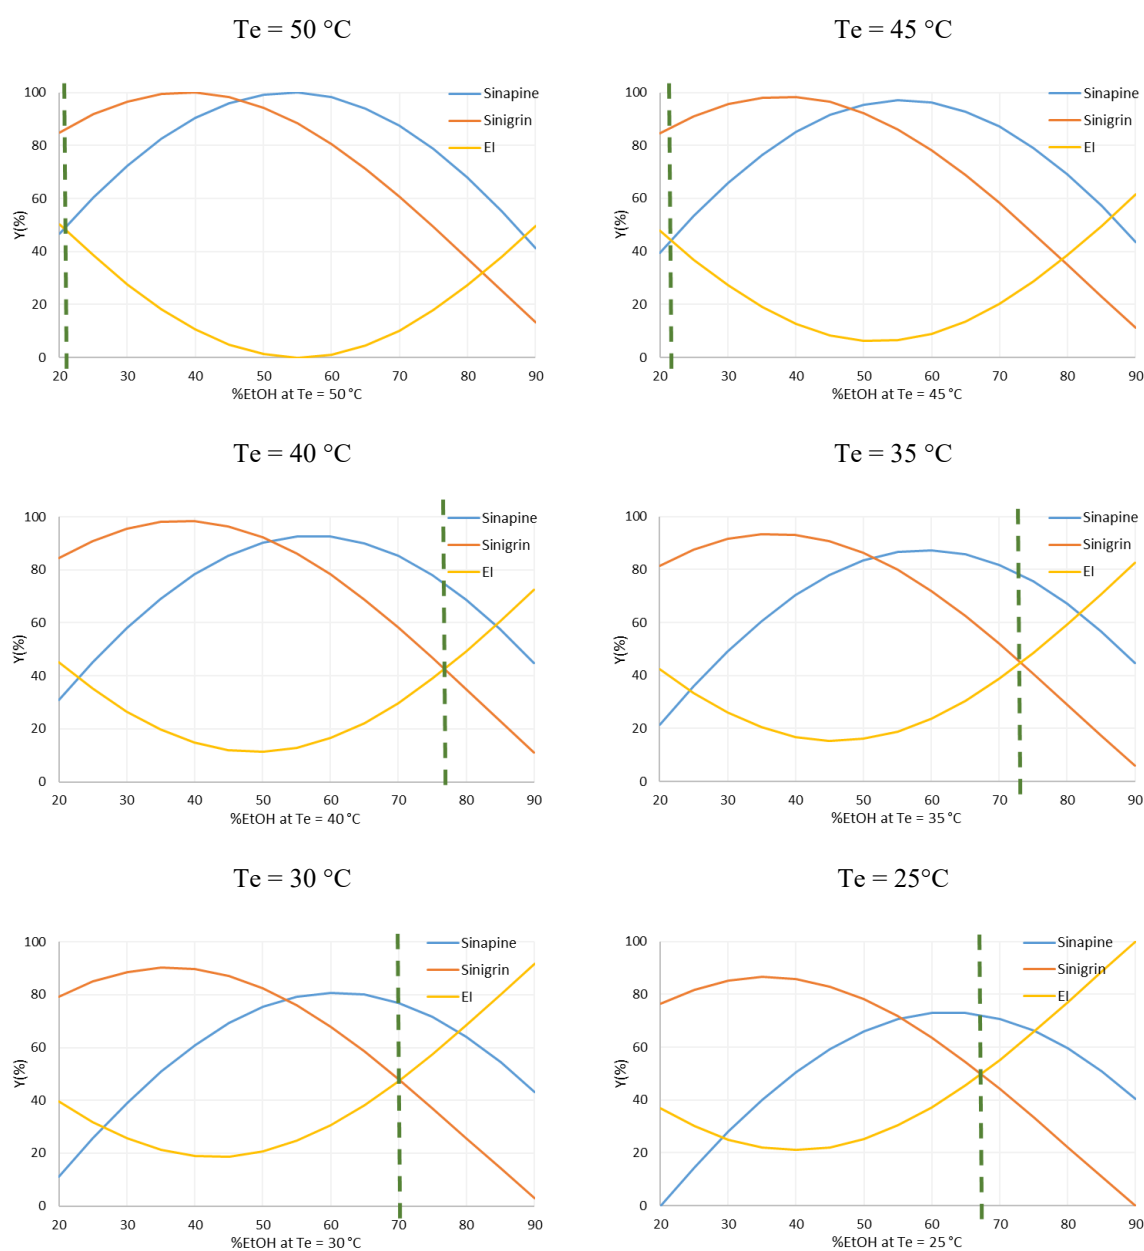

**Figure S3.** Plotting chart to determine desired compromise at different temperatures from 25 to 50 °C. The response values were scaled where the minima and the maxima were set at 0 and 100%, respectively. The X axis presents %EtOH; and Y axis presents scaled responses.
